# Supplementary material for: Ground Tire Rubber Modified by Elastomers via Low-Temperature Extrusion Process: Physico-Mechanical Properties and Volatile Organic Emission Assessment
Source: MDPI journal article supplement (doi:10.3390/polym14030546), 2022-01-28
Supplement: s1 [file s1]

**Table S1.** Characteristic of sampling protocol applied to collect the VOCs emitted to the gas phase/indoors during reactive extrusion and curing characteristics by rubber process analyzer (RPA).

|                                                                                                                                                                                           |                                                                                                   |
|-------------------------------------------------------------------------------------------------------------------------------------------------------------------------------------------|---------------------------------------------------------------------------------------------------|
| Sampling of VOCs directly from the extrusion die was performed for 30 minutes while in case of RPA for 20 minutes (duration of the measurement) using Radiello® diffusive passive sampler |                                                                                                   |
| Radiello® diffusive passive sampler characteristic                                                                                                                                        |                                                                                                   |
| Diffusion membrane made of sintered polyethylene                                                                                                                                          | Length, external diameter and thickness – 60 mm × 16 mm × 5 mm;<br>Diffusion zone length – 150 mm |
| Cylindrical cartridge made of stainless steel net filled with graphitised charcoal Carbograph 4                                                                                           | Length and external diameter – 60 mm × 4.8 mm;<br>Sorbent mass – 300 ± 10 mg                      |
| After the sampling period, the cylindrical containers were placed in glass tubes, closed with PE nut, and transported to the laboratory                                                   |                                                                                                   |
| The liberation process of VOCs collected on the Carbograph 4 was performed using a two-stage thermal desorption technique                                                                 |                                                                                                   |

**Table S2.** Thermal desorption (TD) GC-FID and GC-MS system working parameters used to assess the type and amount of VOCs emitted to the gas phase/indoors during reactive extrusion, as well as in the case of emissions of VOCs from prepared modified GTR samples.

| Working conditions of the two-stage thermal desorption unit                                |                                                                                                                         |                                                                                                                                                                                                       |
|--------------------------------------------------------------------------------------------|-------------------------------------------------------------------------------------------------------------------------|-------------------------------------------------------------------------------------------------------------------------------------------------------------------------------------------------------|
| Analytical procedure acronym                                                               | TD-GC-FID                                                                                                               | TD-GC-MS                                                                                                                                                                                              |
| Applied thermal desorber                                                                   | Markes' Series 2 Thermal Desorption System; UNITY/TD-100                                                                | Unity v.2, Markes International Ltd.                                                                                                                                                                  |
| Steel tube heating time and temperature at the 1 <sup>st</sup> stage of thermal desorption | sample/tube temp. – 290 °C;<br>desorption time – 12 min;<br>gas flow rate – 50 mL/min;<br>microtrap temperature – 0 °C; |                                                                                                                                                                                                       |
| Microtrap heating time and temperature at the 2 <sup>nd</sup> stage of thermal desorption  | microtrap temp. – 300 °C;<br>ballistic heating time – 5 min                                                             |                                                                                                                                                                                                       |
| Flow rate of the inert gas (He) through the microtrap to the chromatographic column        | 2.0 mL/min                                                                                                              | 1.0 mL/min                                                                                                                                                                                            |
| Working conditions of the final determination system                                       |                                                                                                                         |                                                                                                                                                                                                       |
| Gas chromatograph                                                                          | Agilent 7820A GC                                                                                                        | Agilent Technologies 6890                                                                                                                                                                             |
| Detector                                                                                   | Flame ionisation detector, detector temp. 280 °C                                                                        | Mass spectrometer (5873 Network Mass Selective Detector, Agilent Technologies);<br>transmission line temp. of GC-MS: 150 °C;<br>ion source temp. – 230 °C;<br>quadrupole mass analyser temp. – 150 °C |
| Transfer line temperature TD-GC                                                            | 180 °C                                                                                                                  | 160 °C                                                                                                                                                                                                |
| Capillary column                                                                           | DB-1 (30 m × 0.32 mm; stationary phase thickness – 5 µm, J&W, USA);<br>helium flow rate – 2.0 mL/min                    | HP-1MS (30 m × 0.25 mm; stationary phase thickness – 1 µm, J&W, USA);<br>helium flow rate – 1.0 mL/min                                                                                                |
| Temperature programme                                                                      | 45 °C for 1 min;<br>15 °C/min to 120 °C hold for 2 min;<br>10 °C/min up to 250 °C hold for 5 min                        | 50 °C for 1 min;<br>15 °C/min up to 120 °C and hold for 2 min;<br>10 °C/min up to 260 °C and hold for 5 min                                                                                           |

**Table S3.** General description of sampling/conditioning protocol used to estimate the emissions of VOCs released from the surface of prepared modified GTR samples.

|                                                                                                                         |                                                                                                                                                                       |
|-------------------------------------------------------------------------------------------------------------------------|-----------------------------------------------------------------------------------------------------------------------------------------------------------------------|
| Average mass of investigated samples                                                                                    | uncured modified GTR - $1.17 \pm 0.24$ g;<br>cured modified GTR - $2.60 \pm 0.32$ g                                                                                   |
| Sampling/conditioning device                                                                                            | miniature emission chambers system $\mu$ -CTE™ 250 (Markes' Micro-Chamber/Thermal Ex-tractor™, Markes International, Inc) working in a dynamic analytes sampling mode |
| Micro-Chamber/Thermal Extractor™ seasoning conditions of prepared rubber samples                                        | samples conditioning temperature – 40 °C;<br>sampling time – 40 min;<br>nitrogen gas flow rate through a single chamber – 11.5 mL/min                                 |
| Analytes sampling device                                                                                                | Stainless steel tubes filled with Tenax TA (60/80 mesh, stainless steel tube, Merck KGaA, Darmstadt, Germany)                                                         |
| After the sampling, sorption tubes were removed from the outlets of chambers and sealed from both sides with braze nuts |                                                                                                                                                                       |
| The liberation process of VOCs collected on the Tenax TA was performed using a two-stage thermal desorption technique   |                                                                                                                                                                       |
